# Supplementary material for: Measuring Proviral HIV-1 DNA: Hurdles and Improvements to an Assay Monitoring Integration Events Utilising Human Alu Repeat Sequences
Source: MDPI journal article supplement (doi:10.3390/life11121410), 2021-12-16
Supplement: s1 [file s1]

## Supplementary Material

**Table S1.** Primer sequences (5′-3′) used in the integrated HIV-1 DNA assays. All primers and probes were validated in previous assays (Avettand-Fenoel, Chaix et al. 2009, Liszewski, Yu et al. 2009).

|       | Target           | <i>Alu</i> -gag Assay                        | <i>Alu</i> -5LTR Assay |
|-------|------------------|----------------------------------------------|------------------------|
| PCR 1 | Human <i>Alu</i> | GCCTCCCAAAGTGCTGGGATTACAG                    |                        |
|       | (sense)          |                                              |                        |
|       | HIV-1            | GTTCTGCTATGTCACTTCC                          | GTTCTGGGCGCCACTGCTAGA  |
|       | (anti-sense)     |                                              |                        |
| PCR2  | HIV-1 LTR        | TTAAGCCTCAATAAAGCTTGCC                       | (NEC005)               |
|       | (sense)          |                                              | GCCTCAATAAAGCTTGCC     |
|       | HIV-1 LTR        | GTTCTGGGCGCCACTGCTAGA                        | (NEC131)GGCGCCACTGCTAG |
|       | (anti-sense)     |                                              | 3ATTTT                 |
|       | HIV-1 LTR        | FAM/CCAGAGTCA/ZEN/CACAACAGACGGGCACA/3IABKFQ/ |                        |
|       | (probe)          |                                              |                        |

**Table S2.** Patients' information

| patient ID | HIV-1 subtype | Age     | Gender | ART     | Pre-ART                  |             | On ART                   |                               |             |
|------------|---------------|---------|--------|---------|--------------------------|-------------|--------------------------|-------------------------------|-------------|
|            |               |         |        |         | CD4 nadir                | VL          | CD4 count                | Total HIV-1 DNA               | Log VL      |
|            |               | (years) | (M/F)  | (years) | (cells/mm <sup>3</sup> ) | (copies/ml) | (cells/mm <sup>3</sup> ) | (copies/10 <sup>6</sup> PBMC) | (copies/ml) |
| 1          | G             | 47      | M      | 10.3    | 97                       | 5.11        | 369                      | 593.0                         | <1.3        |
| 2          | B             | 37      | F      | 10.3    | 13                       | 5.47        | 1032                     | 315.0                         | <1.3        |
| 3          | B             | 41      | M      | 9.4     | 234                      | 4.99        | 757                      | 3151.0                        | <1.3        |
| 4          | 02_AG         | 43      | M      | 3.8     | 270                      | 5.29        | 558                      | 436.0                         | <1.3        |
| 5          | B             | 49      | M      | 5.2     | 230                      | 4.54        | 746                      | 436.0                         | <1.3        |
| 6          | A             | 51      | F      | 7.3     | 147                      | 4.74        | 1541                     | 130.0                         | <1.3        |
| 7          | B             | 31      | M      | 6.0     | 350                      | 6.88        | 612                      | 124.0                         | <1.3        |
| 8          | B             | 45      | M      | 8.0     | 185                      | >5.00       | 647                      | 910.1                         | <1.3        |
| 9          | B             | 38      | M      | 7.0     | 146                      | 4.82        | 525                      | 463.1                         | <1.3        |
| 10         | B             | 75      | M      | 6.7     | 358                      | 4.91        | 615                      | 279.2                         | <1.3        |
| 11         | B             | 45      | M      | 16.3    | 46                       | 5.26        | 708                      | 341.4                         | <1.3        |
| 12         | B             | 43      | M      | 11.2    | 149                      | 4.38        | 660                      | 407.5                         | <1.3        |
| 13         | B             | 34      | M      | 6.2     | 230                      | 4.68        | 601                      | 621.6                         | <1.3        |
| 14         | B             | 59      | M      | 17.6    | 201                      | 5.19        | 1020                     | 349.8                         | <1.3        |
| 15         | B             | 47      | M      | 15.9    | 0                        | 5.07        | 871                      | 132.4                         | <1.3        |

|    |       |    |   |      |     |      |     |       |      |
|----|-------|----|---|------|-----|------|-----|-------|------|
| 16 | B     | 62 | M | 19.1 | 63  | 6.17 | 908 | 653.9 | <1.3 |
| 17 | B     | 59 | M | 19.3 | 187 | 4.54 | 855 | 291.4 | <1.3 |
| 18 | B     | 49 | M | 12.6 | 44  | 5.93 | 275 | 251.1 | <1.3 |
| 19 | 02_AG | 53 | M | 5.9  | 268 | 5.04 | 938 | 478.8 | <1.3 |
| 20 | 01_AE | 45 | M | 5.3  | 350 | 3.96 | 765 | 205.1 | <1.3 |

**Table S3.** Patients' information.

| Patients' characteristics       |               |
|---------------------------------|---------------|
| N tot                           | 20            |
| Male N(%)                       | 18 (90%)      |
| Subtype B N (%)                 | 15 (75%)      |
| Subtype G                       | 1 (5%)        |
| Subtype 02_AG                   | 2 (10%)       |
| Subtype 01_AE                   | 1 (5%)        |
| Subtype A                       | 1 (5%)        |
| Age                             | 46 (43-52)    |
| Duration of ART                 | 9 (6-14)      |
| CD4 nadir                       | 186 (89-251)  |
| Pre-ART VL                      | 5 (5-5)       |
| CD4 count sampling              | 727 (609-890) |
| Total HIV-1 DNA copies/106 PBMC | 346 (272-471) |
| Plasma HIV-1 RNA > 1.3 log/ml   | 0             |
